# Supplementary material for: Nutritional Quality and Safety of the Spirulina Dietary Supplements Sold on the Slovenian Market
Source: MDPI journal article supplement (doi:10.3390/foods11060849), 2022-03-16
Supplement: s1 [file s1]

**Table S1.** Amino acid composition of *Spirulina* supplements available on the Slovenian market (mg/g dwt).

| Sample | ALA <sup>1</sup> | GLY <sup>2</sup> | VAL <sup>3</sup> | LEU <sup>4</sup> | ILE <sup>5</sup> | THR <sup>6</sup> | SER <sup>7</sup> | PRO <sup>8</sup> | ASP <sup>9</sup> | MET <sup>10</sup> | GLU <sup>11</sup> | PHE <sup>12</sup> | LYS <sup>13</sup> | HIS <sup>14</sup> | TYR <sup>15</sup> |
|--------|------------------|------------------|------------------|------------------|------------------|------------------|------------------|------------------|------------------|-------------------|-------------------|-------------------|-------------------|-------------------|-------------------|
| S1     | 39.2             | 28.4             | 95.6             | 53.8             | 66.8             | 44.6             | 42.4             | 28.7             | 76.0             | 16.4              | 164               | 34.6              | 65.3              | 16.3              | 29.5              |
| S2     | 38.0             | 27.8             | 91.7             | 54.4             | 65.2             | 43.9             | 41.5             | 28.4             | 74.0             | 18.0              | 167               | 34.5              | 36.3              | 17.2              | 29.1              |
| S3     | 37.5             | 28.8             | 91.6             | 51.2             | 68.1             | 46.6             | 44.8             | 28.4             | 80.2             | 19.8              | 175               | 35.5              | 66.5              | 18.1              | 32.5              |
| S4     | 42.0             | 30.7             | 98.6             | 57.6             | 70.0             | 47.5             | 43.9             | 31.9             | 79.5             | 14.7              | 158               | 36.8              | 56.9              | 18.9              | 32.1              |
| S5     | 40.7             | 29.5             | 101              | 54.8             | 72.2             | 47.8             | 47.2             | 30.5             | 84.7             | 16.3              | 190               | 36.1              | 88.9              | 19.2              | 32.3              |
| S6     | 38.2             | 31.9             | 85.8             | 49.8             | 48.0             | 44.3             | 37.8             | 34.9             | 74.9             | 11.6              | 116               | 37.6              | 126               | 19.9              | 28.3              |
| S7     | 28.7             | 24.1             | 71.1             | 44.8             | 57.9             | 47.5             | 42.3             | 25.2             | 85.6             | 20.6              | 195               | 36.6              | 88.3              | 18.8              | 33.9              |
| S8     | 44.8             | 33.3             | 104              | 58.7             | 75.0             | 54.8             | 52.5             | 31.3             | 92.5             | 19.5              | 220               | 40.3              | 77.5              | 19.6              | 37.0              |
| S9     | 21.0             | 16.3             | 50.4             | 32.1             | 33.3             | 27.1             | 25.4             | 20.0             | 47.3             | 12.7              | 90.5              | 24.0              | 48.5              | 15.8              | 18.6              |
| S10    | 42.5             | 32.1             | 102              | 53.5             | 73.9             | 54.8             | 52.5             | 30.8             | 91.9             | 18.6              | 199               | 39.1              | 76.6              | 19.2              | 36.6              |
| S11    | 39.0             | 29.5             | 101              | 56.4             | 75.0             | 50.3             | 46.2             | 30.8             | 91.4             | 22.7              | 145               | 36.7              | 72.9              | 19.2              | 34.8              |
| S12    | 46.1             | 33.1             | 109              | 58.4             | 78.9             | 49.1             | 41.5             | 31.3             | 88.5             | 21.4              | 187               | 35.6              | 68.5              | 18.3              | 36.4              |
| S13    | 41.5             | 29.8             | 102              | 50.8             | 71.9             | 49.8             | 47.0             | 28.8             | 83.6             | 18.8              | 154               | 34.0              | 72.7              | 18.3              | 32.6              |
| S14    | 47.3             | 32.2             | 116              | 54.8             | 79.4             | 45.3             | 38.1             | 30.7             | 80.6             | 19.3              | 151               | 34.0              | 70.7              | 18.8              | 34.5              |
| S15    | 43.5             | 30.5             | 108              | 58.6             | 76.1             | 52.1             | 50.6             | 30.9             | 87.9             | 22.8              | 180               | 37.2              | 95.0              | 20.8              | 37.8              |
| S16    | 38.5             | 29.8             | 91.5             | 51.2             | 68.0             | 45.0             | 36.9             | 27.5             | 83.9             | 20.7              | 162               | 36.0              | 75.0              | 19.0              | 37.4              |
| S17    | 44.7             | 33.4             | 107              | 52.9             | 76.0             | 52.8             | 51.5             | 30.4             | 92.2             | 20.4              | 161               | 36.8              | 96.9              | 20.1              | 36.3              |
| S18    | 32.6             | 25.4             | 67.5             | 45.0             | 46.6             | 36.4             | 32.7             | 24.9             | 63.4             | 15.9              | 122               | 32.0              | 77.9              | 17.7              | 25.8              |
| S19    | 21.8             | 18.1             | 55.4             | 38.0             | 44.2             | 35.6             | 33.5             | 20.2             | 61.4             | 16.1              | 106               | 26.7              | 58.1              | 17.2              | 24.8              |
| S20    | 33.1             | 27.3             | 78.1             | 51.9             | 60.9             | 45.8             | 42.5             | 26.0             | 78.9             | 19.3              | 140               | 34.1              | 61.5              | 19.2              | 32.1              |
| S21    | 26.5             | 31.3             | 109              | 55.5             | 73.5             | 49.9             | 46.9             | 31.3             | 85.7             | 22.0              | 158               | 36.3              | 66.6              | 20.5              | 33.5              |
| S22    | 20.8             | 15.6             | 50.8             | 30.0             | 37.0             | 24.7             | 21.8             | 17.3             | 41.5             | 12.5              | 72.5              | 21.1              | 30.3              | 16.3              | 17.5              |
| S23    | 41.6             | 30.1             | 105              | 54.6             | 74.5             | 49.7             | 45.9             | 30.5             | 85.3             | 20.0              | 160               | 36.2              | 86.9              | 19.8              | 34.9              |
| S24    | 41.3             | 29.1             | 106              | 57.5             | 73.1             | 48.3             | 46.2             | 30.6             | 82.8             | 20.6              | 155               | 33.8              | 78.2              | 21.2              | 32.4              |
| S25    | 37.0             | 27.2             | 94.6             | 55.1             | 67.2             | 47.1             | 44.0             | 27.9             | 80.3             | 17.9              | 167               | 33.4              | 64.6              | 19.0              | 32.4              |
| S26    | 38.5             | 29.3             | 94.9             | 56.5             | 67.9             | 50.3             | 47.6             | 33.4             | 83.4             | 21.5              | 146               | 34.7              | 92.4              | 20.8              | 33.3              |
| S27    | 42.7             | 31.6             | 104              | 61.4             | 74.3             | 54.6             | 53.1             | 30.2             | 89.4             | 22.0              | 196               | 36.4              | 81.7              | 20.8              | 36.8              |
| S28    | 38.4             | 29.3             | 102              | 60.4             | 75.7             | 53.6             | 51.3             | 29.8             | 90.4             | 22.8              | 209               | 37.2              | 97.6              | 22.2              | 38.4              |
| S29    | 41.5             | 29.9             | 107              | 56.8             | 77.9             | 52.7             | 50.5             | 30.8             | 88.3             | 22.5              | 213               | 38.8              | 113               | 22.0              | 38.0              |
| S30    | 36.4             | 27.2             | 96.0             | 56.7             | 69.2             | 50.4             | 48.0             | 28.5             | 85.3             | 19.6              | 148               | 35.2              | 93.8              | 20.4              | 34.8              |
| S31    | 45.3             | 32.0             | 116              | 60.3             | 82.7             | 56.5             | 52.2             | 33.0             | 96.8             | 21.8              | 165               | 40.3              | 102               | 21.9              | 37.9              |
| S32    | 35.4             | 25.7             | 92.5             | 53.2             | 66.2             | 45.5             | 42.1             | 27.8             | 76.1             | 19.9              | 127               | 32.2              | 64.0              | 19.0              | 30.8              |
| S33    | 37.9             | 26.8             | 96.0             | 56.9             | 70.8             | 47.7             | 43.7             | 28.5             | 79.7             | 20.4              | 152               | 34.0              | 77.6              | 19.5              | 33.2              |
| S34    | 36.7             | 26.3             | 93.1             | 54.9             | 68.4             | 44.3             | 42.1             | 27.8             | 76.5             | 20.2              | 138               | 32.2              | 66.7              | 18.3              | 30.5              |
| S35    | 43.8             | 30.3             | 109              | 61.7             | 78.6             | 49.6             | 46.2             | 31.0             | 82.6             | 22.3              | 158               | 36.6              | 67.8              | 20.0              | 34.7              |
| S36    | 49.3             | 34.0             | 123              | 67.4             | 84.4             | 58.9             | 58.2             | 34.6             | 101              | 23.2              | 197               | 39.1              | 93.0              | 21.8              | 38.4              |
| S37    | 26.8             | 18.4             | 66.4             | 37.4             | 47.4             | 33.5             | 33.6             | 20.9             | 58.1             | 15.6              | 135               | 24.3              | 47.3              | 17.7              | 22.3              |
| S38    | 43.7             | 30.1             | 113              | 63.0             | 80.7             | 55.5             | 53.2             | 31.2             | 94.3             | 23.3              | 202               | 38.3              | 97.6              | 21.8              | 38.4              |
| S39    | 42.7             | 31.3             | 111              | 64.2             | 81.0             | 57.6             | 56.1             | 31.6             | 97.6             | 24.7              | 212               | 39.2              | 100               | 22.0              | 39.0              |
| S40    | 48.8             | 33.6             | 119              | 66.9             | 85.8             | 58.6             | 58.2             | 32.2             | 93.9             | 24.4              | 187               | 39.5              | 93.3              | 21.1              | 39.7              |
| S41    | 32.8             | 25.0             | 86.4             | 50.2             | 62.5             | 42.1             | 38.4             | 26.8             | 70.0             | 17.9              | 191               | 32.6              | 51.2              | 18.1              | 29.4              |
| S42    | 44.6             | 30.6             | 112              | 63.0             | 79.1             | 53.2             | 51.0             | 31.4             | 89.8             | 21.2              | 214               | 37.7              | 78.4              | 20.5              | 36.7              |
| S43    | 42.9             | 30.7             | 103              | 61.1             | 73.1             | 49.3             | 46.9             | 30.5             | 81.7             | 20.6              | 171               | 36.2              | 67.3              | 18.8              | 34.8              |
| S44    | 44.4             | 30.3             | 108              | 62.5             | 76.8             | 52.6             | 49.5             | 31.5             | 87.3             | 21.5              | 170               | 37.3              | 60.9              | 19.6              | 36.2              |

|     |      |      |     |      |      |      |      |      |      |      |     |      |      |      |      |
|-----|------|------|-----|------|------|------|------|------|------|------|-----|------|------|------|------|
| S45 | 47.4 | 31.5 | 118 | 66.6 | 83.5 | 53.7 | 51.9 | 32.2 | 89.1 | 22.3 | 217 | 38.2 | 112  | 22.1 | 38.2 |
| S46 | 45.9 | 30.3 | 106 | 61.6 | 76.3 | 53.7 | 51.8 | 30.5 | 91.1 | 23.6 | 237 | 36.0 | 93.6 | 21.7 | 37.2 |

---

<sup>1</sup> Alanine; <sup>2</sup> Glycine; <sup>3</sup> Valine; <sup>4</sup> Leucine; <sup>5</sup> Isoleucine; <sup>6</sup> Threonine; <sup>7</sup> Serine; <sup>8</sup> Proline; <sup>9</sup> Aspartate; <sup>10</sup> Methionine; <sup>11</sup> Glutamate;

<sup>12</sup> Phenylalanine; <sup>13</sup> Lysine; <sup>14</sup> Histidine; <sup>15</sup> Tyrosine

**Table S2.** Fatty acid composition of *Spirulina* supplements available on the Slovenian market (% of total fatty acid content).

| Sample | C14:0 | C14:1 | C15:0 | C16:0 | C16:1n7 | C16:2n6 | C16:2n4 | C17:0 | C17:1 | C16:3n3 | C18:0 | C18:1n9c<br>/C18:1n9t | C18:2n6c | C18:3n6 | C18:3n3 | C20:3n6 | C22:0 |
|--------|-------|-------|-------|-------|---------|---------|---------|-------|-------|---------|-------|-----------------------|----------|---------|---------|---------|-------|
| S1     | 0.38  | 0.36  | 0.00  | 43.1  | 3.07    | 0.00    | 0.22    | 0.36  | 0.22  | 0.00    | 6.54  | 4.77                  | 25.3     | 15.8    | 0.19    | 0.00    | 0.00  |
| S2     | 0.52  | 1.10  | 0.00  | 40.9  | 5.58    | 0.00    | 0.00    | 0.39  | 0.55  | 0.00    | 10.6  | 8.35                  | 19.1     | 12.8    | 0.35    | 0.00    | 0.00  |
| S3     | 0.40  | 0.30  | 0.00  | 41.3  | 8.03    | 0.00    | 0.49    | 0.27  | 0.34  | 0.00    | 1.40  | 3.45                  | 24.0     | 20.2    | 0.00    | 0.00    | 0.00  |
| S4     | 0.37  | 0.46  | 0.00  | 42.0  | 7.58    | 0.00    | 0.42    | 0.25  | 0.45  | 0.00    | 2.64  | 5.24                  | 21.0     | 20.1    | 0.00    | 0.00    | 0.00  |
| S5     | 0.44  | 0.37  | 0.00  | 38.9  | 11.3    | 0.00    | 0.96    | 0.27  | 0.24  | 0.00    | 1.41  | 2.26                  | 21.7     | 22.0    | 0.00    | 0.47    | 0.00  |
| S6     | 0.59  | 0.00  | 0.22  | 18.4  | 5.56    | 9.71    | 9.38    | 0.35  | 0.00  | 9.58    | 4.13  | 4.36                  | 22.0     | 0.00    | 18.4    | 0.00    | 0.27  |
| S7     | 0.32  | 0.00  | 0.00  | 42.8  | 4.19    | 0.00    | 0.21    | 0.39  | 0.34  | 0.00    | 12.3  | 3.46                  | 19.0     | 16.9    | 0.00    | 0.30    | 0.00  |
| S8     | 0.36  | 0.45  | 0.00  | 41.7  | 5.85    | 0.00    | 0.39    | 0.37  | 0.31  | 0.00    | 4.52  | 3.66                  | 21.5     | 20.5    | 0.00    | 0.24    | 0.00  |
| S9     | 0.84  | 0.00  | 0.15  | 24.6  | 2.75    | 5.52    | 0.00    | 0.25  | 0.40  | 5.27    | 2.13  | 4.23                  | 21.3     | 5.69    | 22.8    | 0.00    | 0.59  |
| S10    | 0.29  | 0.12  | 0.00  | 42.1  | 7.88    | 0.00    | 0.51    | 0.27  | 0.31  | 0.00    | 1.71  | 3.55                  | 22.3     | 21.0    | 0.00    | 0.00    | 0.00  |
| S11    | 0.28  | 0.23  | 0.00  | 41.0  | 7.81    | 0.00    | 0.52    | 0.25  | 0.28  | 0.00    | 0.97  | 2.57                  | 22.4     | 24.1    | 0.00    | 0.00    | 0.00  |
| S12    | 0.33  | 0.33  | 0.00  | 42.6  | 6.66    | 0.00    | 0.41    | 0.35  | 0.36  | 0.00    | 1.76  | 3.74                  | 22.7     | 20.9    | 0.00    | 0.00    | 0.00  |
| S13    | 0.40  | 0.33  | 0.00  | 43.1  | 6.36    | 0.29    | 0.41    | 0.33  | 0.33  | 0.00    | 3.85  | 3.67                  | 21.3     | 19.3    | 0.54    | 0.00    | 0.00  |
| S14    | 0.35  | 0.14  | 0.00  | 41.4  | 5.49    | 0.00    | 0.40    | 0.27  | 0.32  | 0.00    | 9.56  | 2.52                  | 21.1     | 18.5    | 0.00    | 0.00    | 0.00  |
| S15    | 0.31  | 0.19  | 0.00  | 43.5  | 5.99    | 0.44    | 0.00    | 0.29  | 0.36  | 0.00    | 1.57  | 3.06                  | 24.0     | 20.3    | 0.00    | 0.00    | 0.00  |
| S16    | 0.36  | 0.00  | 0.00  | 44.8  | 6.25    | 0.00    | 0.37    | 0.00  | 0.31  | 0.00    | 1.98  | 4.33                  | 21.9     | 19.7    | 0.00    | 0.00    | 0.00  |
| S17    | 0.35  | 0.33  | 0.00  | 41.6  | 6.70    | 0.00    | 0.44    | 0.31  | 0.34  | 0.00    | 1.61  | 3.66                  | 22.9     | 21.6    | 0.20    | 0.20    | 0.00  |
| S18    | 0.24  | 0.08  | 0.00  | 28.3  | 4.15    | 14.6    | 0.20    | 0.12  | 0.23  | 1.56    | 0.88  | 3.66                  | 34.4     | 8.84    | 2.52    | 0.00    | 0.00  |
| S19    | 0.54  | 0.00  | 0.00  | 45.9  | 3.81    | 0.00    | 0.00    | 0.29  | 0.00  | 0.00    | 25.8  | 1.82                  | 12.1     | 9.72    | 0.00    | 0.00    | 0.00  |
| S20    | 0.35  | 0.41  | 0.00  | 42.1  | 6.94    | 0.00    | 0.44    | 0.33  | 0.35  | 0.00    | 4.32  | 4.01                  | 20.8     | 19.7    | 0.00    | 0.24    | 0.00  |
| S21    | 0.33  | 0.38  | 0.00  | 35.7  | 8.20    | 1.12    | 0.56    | 0.33  | 0.42  | 2.00    | 4.03  | 3.61                  | 19.1     | 20.3    | 3.45    | 0.43    | 0.00  |
| S22    | 0.41  | 0.33  | 0.00  | 45.1  | 4.44    | 0.42    | 0.00    | 0.33  | 0.29  | 0.35    | 12.1  | 3.88                  | 17.9     | 13.8    | 0.70    | 0.00    | 0.00  |
| S23    | 0.38  | 0.44  | 0.00  | 42.5  | 6.12    | 0.00    | 0.46    | 0.38  | 0.36  | 0.00    | 4.40  | 3.64                  | 20.9     | 20.5    | 0.00    | 0.00    | 0.00  |
| S24    | 0.34  | 0.41  | 0.00  | 44.7  | 6.54    | 0.00    | 0.44    | 0.40  | 0.41  | 0.00    | 2.47  | 4.88                  | 20.7     | 18.6    | 0.00    | 0.00    | 0.00  |
| S25    | 0.34  | 0.00  | 0.00  | 41.4  | 7.57    | 0.00    | 0.59    | 0.32  | 0.34  | 0.00    | 3.95  | 3.18                  | 22.5     | 19.8    | 0.00    | 0.41    | 0.00  |
| S26    | 0.40  | 1.12  | 0.00  | 38.8  | 7.96    | 0.00    | 0.39    | 0.42  | 0.72  | 0.00    | 3.12  | 9.34                  | 22.5     | 14.6    | 0.67    | 0.00    | 0.00  |
| S27    | 0.27  | 0.00  | 0.00  | 42.5  | 7.83    | 0.00    | 0.49    | 0.00  | 0.39  | 0.00    | 1.38  | 3.01                  | 24.3     | 19.8    | 0.00    | 0.00    | 0.00  |
| S28    | 0.30  | 0.00  | 0.00  | 43.3  | 6.41    | 0.00    | 0.38    | 0.27  | 0.35  | 0.00    | 5.09  | 3.93                  | 22.2     | 17.9    | 0.00    | 0.00    | 0.00  |

|     |      |      |      |      |      |      |      |      |      |      |      |      |      |      |      |      |      |
|-----|------|------|------|------|------|------|------|------|------|------|------|------|------|------|------|------|------|
| S29 | 0.29 | 0.33 | 0.00 | 39.8 | 8.60 | 0.00 | 0.60 | 0.36 | 0.40 | 0.00 | 4.27 | 3.27 | 19.0 | 22.9 | 0.00 | 0.46 | 0.00 |
| S30 | 0.28 | 0.34 | 0.00 | 40.3 | 8.69 | 0.00 | 0.55 | 0.33 | 0.37 | 0.00 | 4.49 | 3.25 | 18.8 | 22.3 | 0.00 | 0.42 | 0.00 |
| S31 | 0.33 | 0.42 | 0.00 | 42.3 | 6.92 | 0.00 | 0.48 | 0.34 | 0.34 | 0.00 | 2.13 | 3.83 | 20.4 | 22.3 | 0.35 | 0.00 | 0.00 |
| S32 | 0.37 | 0.42 | 0.21 | 41.6 | 7.27 | 0.00 | 0.44 | 0.28 | 0.34 | 0.00 | 4.19 | 4.03 | 20.9 | 19.9 | 0.00 | 0.00 | 0.00 |
| S33 | 0.31 | 0.27 | 0.00 | 41.5 | 7.93 | 0.00 | 0.43 | 0.24 | 0.47 | 0.00 | 1.55 | 4.06 | 23.4 | 19.7 | 0.00 | 0.40 | 0.00 |
| S34 | 0.63 | 0.69 | 0.00 | 39.8 | 8.14 | 0.21 | 0.48 | 0.37 | 0.31 | 0.00 | 7.50 | 3.00 | 19.9 | 17.3 | 0.45 | 0.72 | 0.00 |
| S35 | 0.38 | 0.34 | 0.00 | 42.6 | 7.00 | 0.00 | 0.39 | 0.27 | 0.39 | 0.00 | 4.93 | 4.02 | 22.7 | 17.0 | 0.00 | 0.00 | 0.00 |
| S36 | 0.50 | 0.77 | 0.00 | 42.1 | 8.01 | 0.00 | 0.48 | 0.37 | 0.37 | 0.00 | 1.92 | 4.55 | 22.4 | 18.5 | 0.00 | 0.00 | 0.00 |
| S37 | 0.48 | 0.12 | 0.00 | 30.3 | 5.34 | 0.00 | 0.25 | 0.12 | 0.14 | 0.00 | 8.95 | 1.72 | 11.1 | 10.6 | 0.00 | 0.00 | 30.2 |
| S38 | 0.31 | 0.00 | 0.00 | 40.6 | 4.87 | 0.00 | 0.26 | 0.40 | 0.50 | 0.00 | 9.88 | 4.27 | 22.3 | 16.4 | 0.00 | 0.29 | 0.00 |
| S39 | 0.41 | 0.26 | 0.00 | 43.7 | 6.21 | 0.00 | 0.38 | 0.35 | 0.33 | 0.00 | 9.72 | 3.06 | 17.6 | 17.9 | 0.00 | 0.35 | 0.00 |
| S40 | 0.34 | 0.00 | 0.00 | 41.0 | 5.23 | 0.00 | 0.27 | 0.39 | 0.51 | 0.00 | 10.3 | 4.43 | 22.1 | 15.3 | 0.00 | 0.30 | 0.00 |
| S41 | 0.23 | 0.00 | 0.00 | 39.7 | 11.7 | 0.00 | 0.88 | 0.22 | 0.29 | 0.00 | 1.22 | 2.20 | 22.9 | 20.9 | 0.00 | 0.00 | 0.00 |
| S42 | 0.51 | 0.53 | 0.00 | 43.9 | 8.37 | 0.00 | 0.49 | 0.33 | 0.44 | 0.00 | 1.66 | 4.43 | 22.5 | 16.8 | 0.00 | 0.35 | 0.00 |
| S43 | 0.43 | 0.29 | 0.00 | 43.9 | 7.12 | 0.00 | 0.35 | 0.36 | 0.47 | 0.00 | 1.80 | 4.56 | 22.9 | 17.7 | 0.00 | 0.32 | 0.00 |
| S44 | 0.31 | 0.80 | 0.00 | 38.7 | 9.13 | 0.00 | 0.41 | 0.27 | 0.64 | 0.00 | 1.25 | 7.66 | 23.5 | 16.5 | 0.00 | 0.82 | 0.00 |
| S45 | 0.34 | 0.21 | 0.00 | 41.8 | 6.26 | 0.00 | 0.35 | 0.37 | 0.45 | 0.00 | 1.83 | 4.63 | 24.3 | 19.5 | 0.00 | 0.00 | 0.00 |
| S46 | 0.26 | 0.00 | 0.00 | 40.6 | 6.99 | 0.00 | 0.38 | 0.00 | 0.41 | 0.00 | 1.69 | 4.00 | 31.0 | 14.5 | 0.00 | 0.34 | 0.00 |

---
